# Supplementary material for: Enhanced near room temperature magnetocaloric effect in La0.6Ca0.4MnO3 for magnetic refrigeration application
Source: Royal Society of Chemistry journal article supplement (doi:10.1039/c7ra06619h), 2017-01-01
Supplement: c7ra06619h1.pdf [file c7ra06619h1.pdf]

# Enhanced Near Room Temperature Magnetocaloric Effect in $\text{La}_{0.6}\text{Ca}_{0.4}\text{MnO}_3$ for Magnetic Refrigeration Application

## Supplemental information

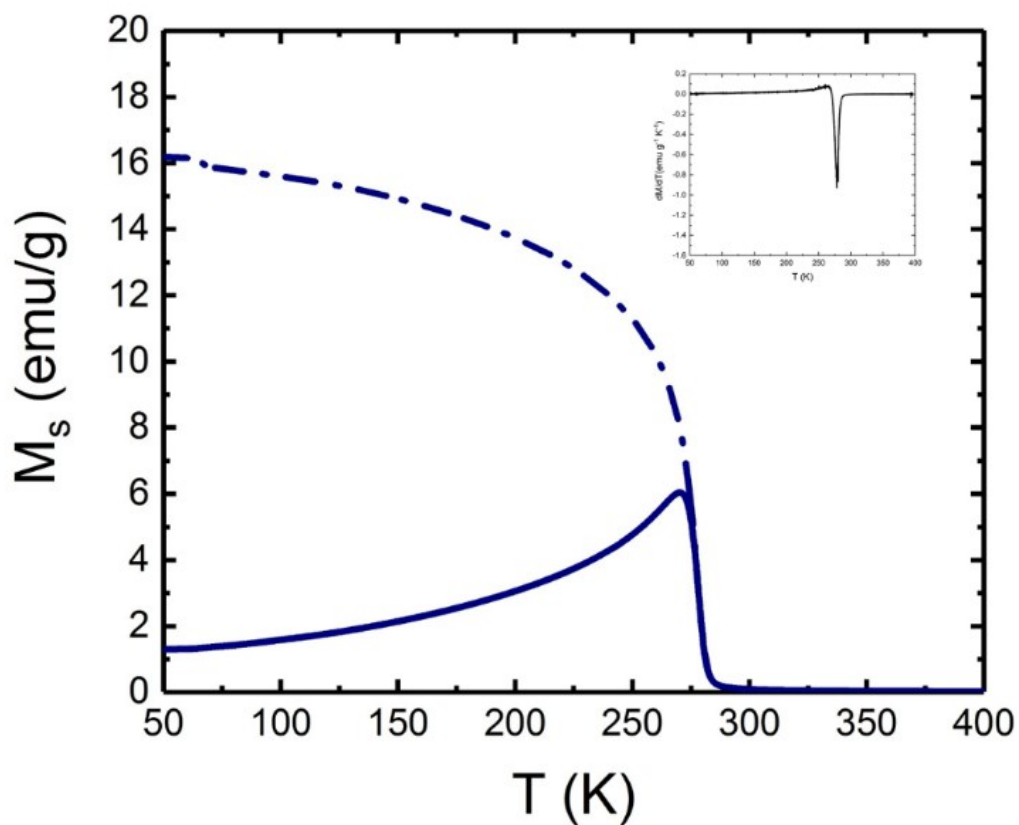

**Fig. S1** Representation of Curie temperature  $T_C$  calculation. This is achieved by taking the derivative of ZFC curve.

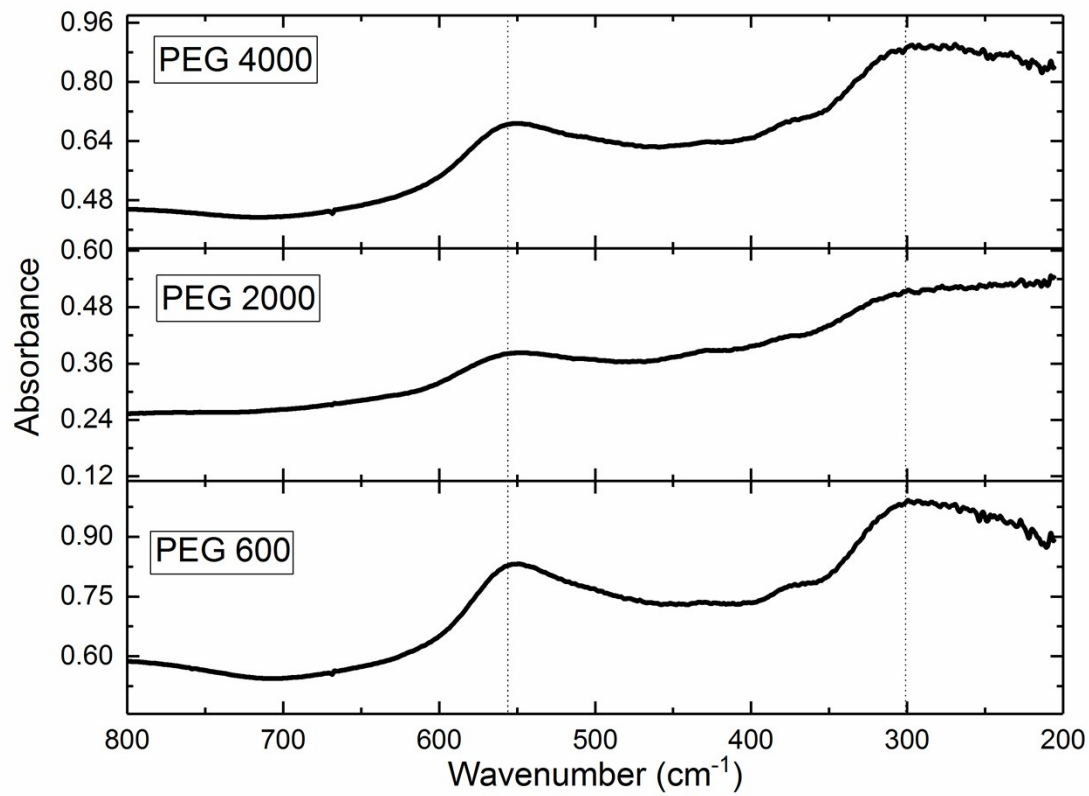

**Fig. S2** Far-IR spectroscopy of as-synthesized LCMO samples.
